# Supplementary material
Source: Springer Nature journal article supplement (https://www.springermedizin.de/resource/supplementary/12885_2009_1988_MOESM3_ESM.pdf/9460250)

21

31

41

51

61

71

acttgtggtagttggagctggtggcgtaggcaagagtgcccttgacgatacagctaattcagaat

K L V V V G A G G V G K S A L T I Q L I Q N

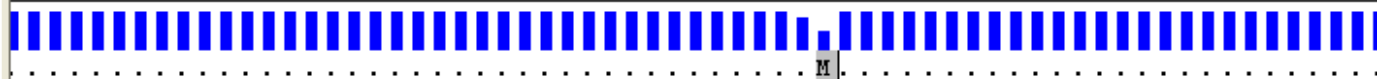

ACTTGTGGTAGTTGGAGCTGGTGGCGTAGGC AAGAGTGMCTTGAACGATACAGCTAATTCAGAAATC

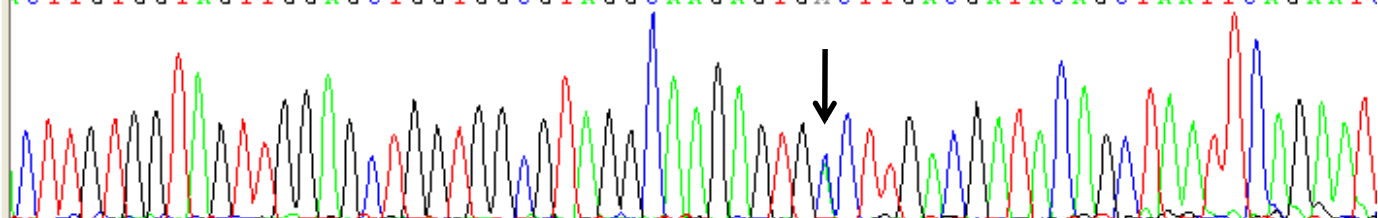

ACTTGTGGTAGTTGGAGCTGGTGGCGTAGGC AAGAGTGMCTTGAACGATACAGCTAATTCAGAAATC

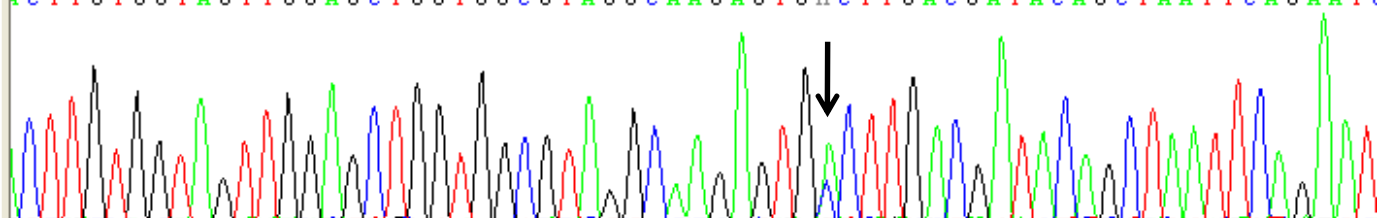

Supplement: MOESM3 [file 9460250]
